# Supplementary material for: Preparation of Mesoporous Silica‐Supported Chiral Amino Alcohols for the Enantioselective Addition of Diethylzinc to Aldehyde and Asymmetric Transfer Hydrogenation to Ketones
Source: Hindawi journal article supplement (doi:10.1155/2015/381836), 2015-01-01
Supplement: f1 [file 381836.f1.pdf]

## Graphical abstract

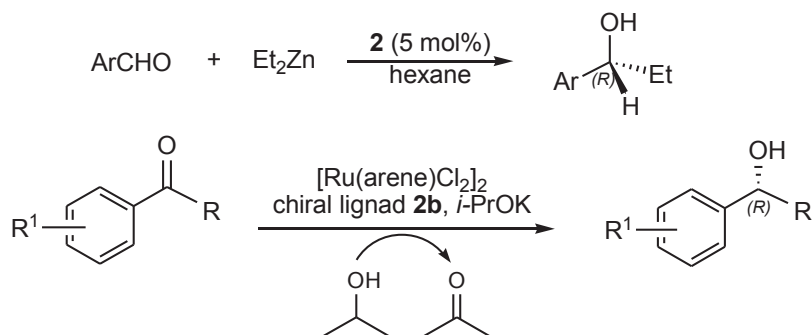

Optically active (-)-ephedrine, (-)-norephedrine and (-)-prolinol were immobilized onto cubic mesoporous MCM-48 silica. The supported ligands were efficiently promoted asymmetric addition of diethylzinc to aldehydes and transfer hydrogenation of ketones to give the optically active secondary alcohols with high yield and enantioselectivity.
